# Supplementary material
Source: PubMed Central journal article supplement (PMC5117818)
Supplement: NIHMS805339-supplement-supplement_1.pdf [file NIHMS805339-supplement-supplement_1.pdf]

## SUPPLEMENT

**Supplemental Table 1:** Associations of different SD quartiles and various outcomes in multivariable model adjusted for Model 5 variables and adherence to antihypertensive medications in a subgroup of individuals prescribed antihypertensive drugs.

| SD        | Adjusted hazard ratio (95% confidence interval) |                  |                  |                  |
|-----------|-------------------------------------------------|------------------|------------------|------------------|
| Quartiles | All-cause mortality                             | Incident CHD     | Incident stroke  | Incident ESRD    |
| 1         | 1                                               | 1                | 1                | 1                |
| 2         | 0.97 (0.94-1.00)                                | 1.83 (1.66-2.01) | 1.77 (1.58-1.98) | 0.87 (0.59-1.27) |
| 3         | 1.13 (1.10-1.17)                                | 2.86 (2.61-3.13) | 2.95 (2.66-3.28) | 1.42 (1.01-2.00) |
| 4         | 1.63 (1.58-1.68)                                | 4.76 (4.36-5.20) | 5.48 (4.94-6.08) | 5.77 (4.20-7.94) |

Footnotes: SD, standard deviation; CHD, coronary heart disease; ESRD, end-stage renal disease.

**Supplemental Table 2:** Associations of different SD quartiles of SBP limited to the initial 12-month period and various outcomes in multivariable model adjusted for Model 5 variables.

| SD Quartiles | Adjusted hazard ratio (95% confidence interval) |                  |                  |                  |
|--------------|-------------------------------------------------|------------------|------------------|------------------|
|              | All-cause mortality                             | Incident CHD     | Incident stroke  | Incident ESRD    |
| 1            | 1                                               | 1                | 1                | 1                |
| 2            | 1.08 (1.07-1.10)                                | 1.05 (1.02-1.08) | 1.10 (1.06-1.13) | 1.18 (1.06-1.32) |
| 3            | 1.25 (1.24-1.27)                                | 1.16 (1.13-1.20) | 1.26 (1.23-1.30) | 1.44 (1.29-1.60) |
| 4            | 1.47 (1.46-1.49)                                | 1.35 (1.31-1.39) | 1.59 (1.54-1.64) | 2.10 (1.90-2.33) |

Footnotes: SD, standard deviation; CHD, coronary heart disease; ESRD, end-stage renal disease.

**Supplemental Figure 1: Cohort selection flow chart**

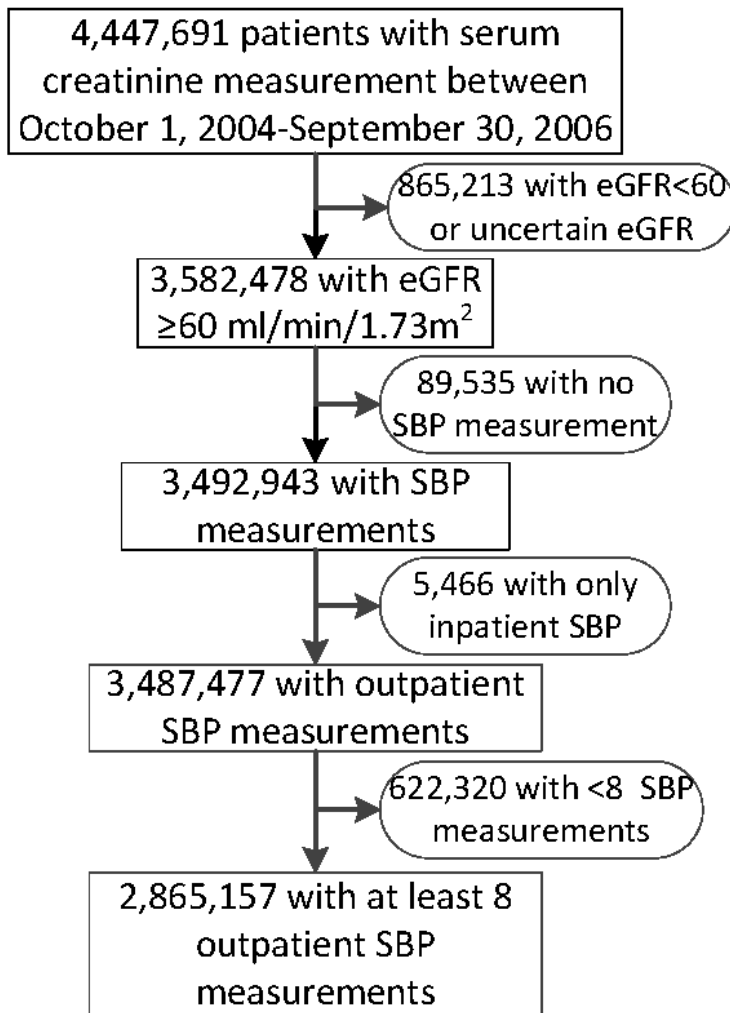

**Supplemental Figure 2: Subgroup Analysis of Adjusted Hazard Ratios and 95% confidence intervals of outcomes of interest associated with different SD quartiles of mean blood pressure in different geographic regions**

A.

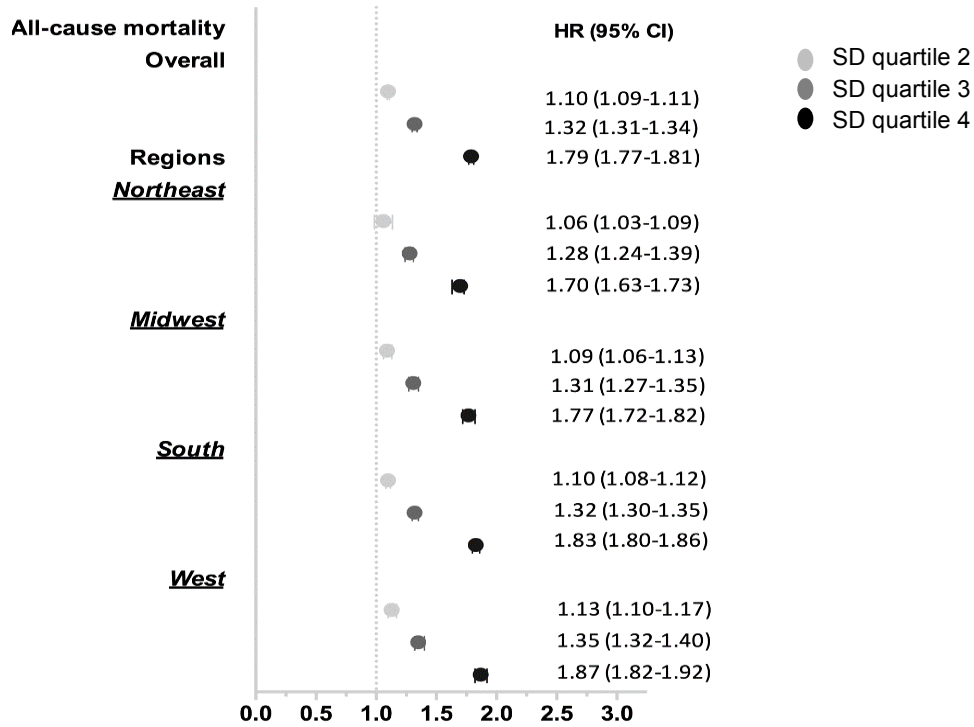

B.

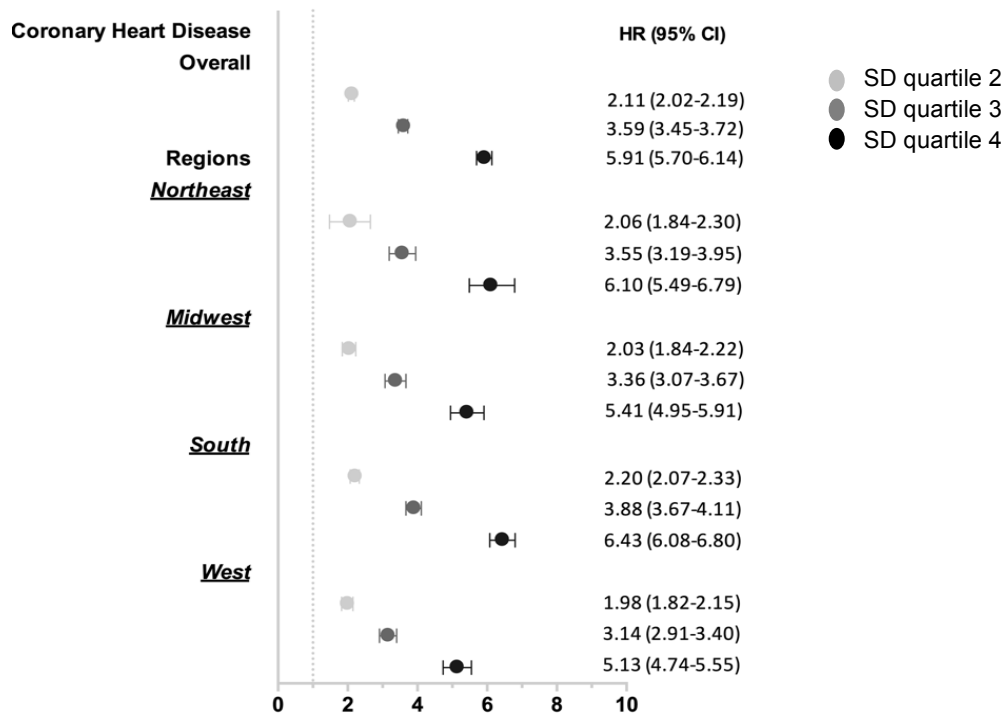

C.

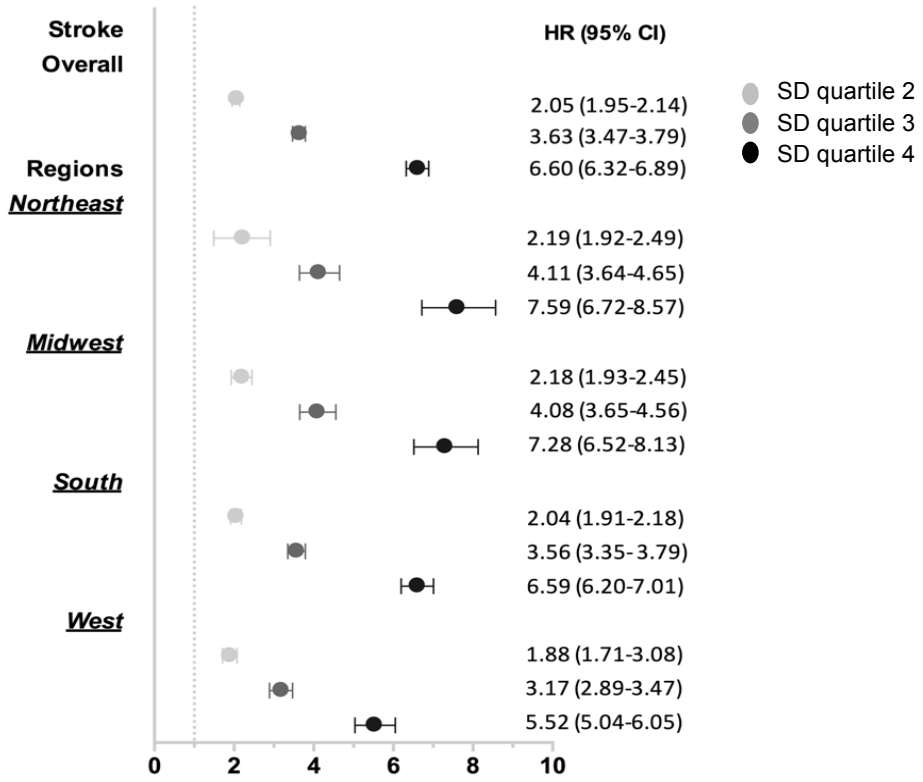

D.

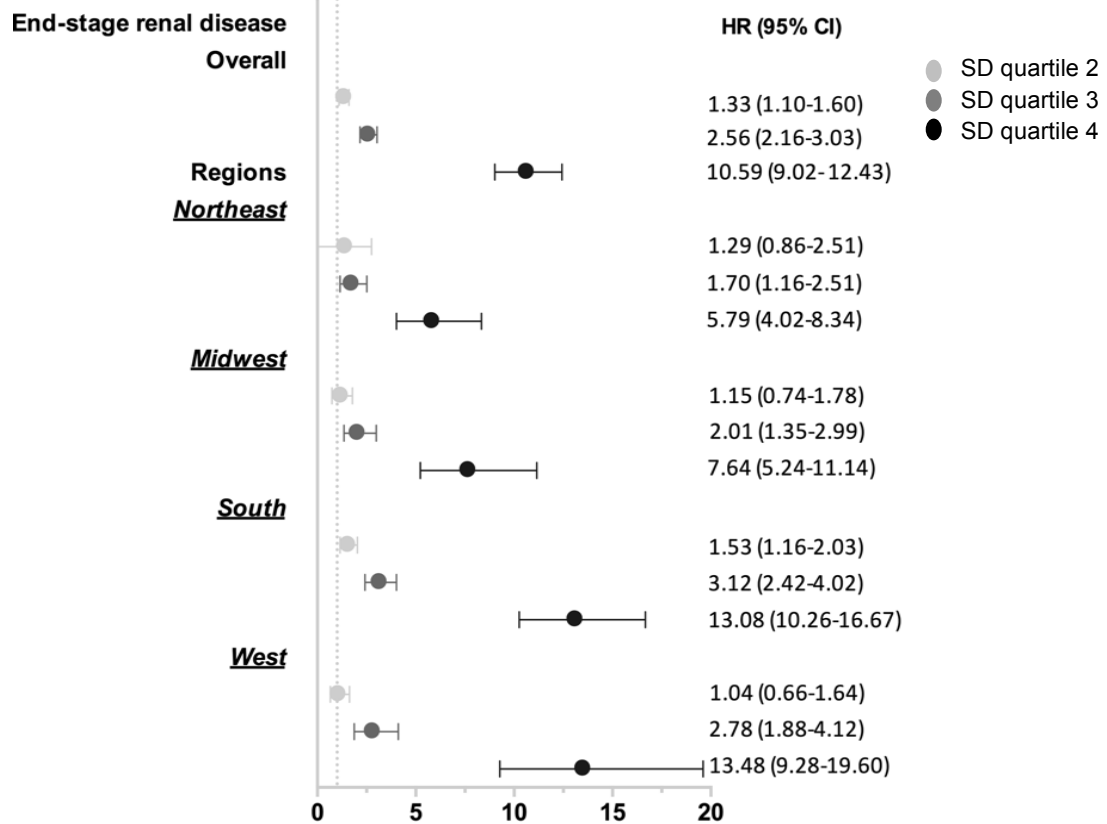

Footnotes: SD quartile 1 served as a reference group. HR, hazard ratio; 95% CI- 95% Confidence Interval. A. Adjusted Hazard ratios and 95% confidence intervals of all-cause mortality associated with different SD quartiles of mean blood pressure in various geographic regions. B. Adjusted Hazard ratios and 95% confidence intervals of incident coronary artery disease associated with different SD quartiles of mean blood pressure in various geographic regions. C. Adjusted Hazard ratios and 95% confidence intervals of incident stroke associated with different SD quartiles of mean blood pressure in various geographic regions. D. Adjusted Hazard ratios and 95% confidence intervals of incident end-stage renal disease associated with different SD quartiles of mean blood pressure in various geographic region.
